# Supplementary material for: Validation of the German Version of the P4 Suicidality Tool
Source: MDPI journal article supplement (doi:10.3390/jcm12155047), 2023-07-31
Supplement: s1 [file s1]

## Supplementary Part (Subgroups):

### ST1. Prevalence of P4 Risk Categories and Correlation with Other Scale Items and Scores (subgroups)

#### Specialized care

|                                                 | Total (n=119)  |                                               | Women (n=71) |                                               | Men (n=48) |                                              | Intercorrelations (convergent validity) ** |                             |                                    |                                    |               |             |              |             |
|-------------------------------------------------|----------------|-----------------------------------------------|--------------|-----------------------------------------------|------------|----------------------------------------------|--------------------------------------------|-----------------------------|------------------------------------|------------------------------------|---------------|-------------|--------------|-------------|
|                                                 | no risk        | risk                                          | no risk      | risk                                          | no risk    | risk                                         | SBQ-R_1<br>(lifetime<br>SI/attempts)       | SBQ-R_2<br>(12-month<br>SI) | SBQ-R_3<br>(threatened<br>suicide) | SBQ-R_4<br>(suicide<br>likelihood) | SBQ-R<br>_sum | PMH<br>_sum | PHQ9<br>_sum | PHQ9_<br>09 |
| <b>P4_1<br/>(past attempt)</b>                  | 84 (70.6%)     | 35 (29.4%)                                    | 46 (64.8%)   | 25 (35.2%)                                    | 38 (79.2%) | 10 (20.8%)                                   | .756**                                     | .284**                      | .316**                             | .318**                             | .371**        | .006        | .142         | .284**      |
| <b>P4_2<br/>(suicide plan)</b>                  | 43 (36.1%)     | 76 (63.9%)                                    | 22 (31.0%)   | 49 (69%)                                      | 21 (43.8%) | 27(56.3%)                                    | .521**                                     | .603**                      | .504**                             | .319**                             | .609**        | .076        | .060         | .246**      |
| <b>P4_3<br/>(suicide likelihood)</b>            | 102<br>(85.7%) | 17 (14.3%)                                    | 59 (83.1%)   | 12 (16.9%)                                    | 43 (89.6%) | 5 (10.4%)                                    | .089                                       | .201*                       | .203*                              | .374**                             | .133          | -.131       | .204*        | .310**      |
| <b>P4_4<br/>(preventive factors)</b>            | 105<br>(88.2%) | 14 (11.8%)                                    | 63 (88.7%)   | 8 (11.3%)                                     | 42 (87.5%) | 6 (12.5%)                                    | .019                                       | .064                        | .086                               | .112                               | .082          | -.205*      | .030         | .132        |
| <b>P4_risk<br/>(minimal, lower,<br/>higher)</b> | 34 (28.6%)     | lower: 61<br>(51.3%)<br>higher: 24<br>(20.2%) | 17 (23.9%)   | lower: 39<br>(54.9%)<br>higher: 15<br>(21.2%) | 17 (35.4%) | lower: 22<br>(45.8%)<br>higher: 9<br>(18.8%) | .335**                                     | .405**                      | .345**                             | .420**                             | .448**        | -.121       | .124         | .365**      |

\*\* correlation is significant at P < .01 level, \*corelation is significant at p< .05

#### Primary care

|                                                 | Total (n=104) |                                               | Women (n=68)  |                                           | Men (n=36)    |                                              | Intercorrelations (convergent validity) * |                             |                                    |                                    |               |             |              |             |
|-------------------------------------------------|---------------|-----------------------------------------------|---------------|-------------------------------------------|---------------|----------------------------------------------|-------------------------------------------|-----------------------------|------------------------------------|------------------------------------|---------------|-------------|--------------|-------------|
|                                                 | no risk       | risk                                          | no risk       | risk                                      | no risk       | risk                                         | SBQ-R_1<br>(lifetime<br>SI/attempts)      | SBQ-R_2<br>(12-month<br>SI) | SBQ-R_3<br>(threatened<br>suicide) | SBQ-R_4<br>(suicide<br>likelihood) | SBQ-R<br>_sum | PMH<br>_sum | PHQ9<br>_sum | PHQ9_<br>09 |
| <b>P4_1<br/>(past attempt)</b>                  | 76 (73.1%)    | 28 (26.9%)                                    | 50<br>(73.5%) | 18 (26.5%)                                | 26 (72.2%)    | 10 (27.8%)                                   | .725**                                    | .291**                      | .295**                             | .228*                              | .309**        | .06         | .07          | .18         |
| <b>P4_2<br/>(suicide plan)</b>                  | 41 (39.4%)    | 63 (60.6%)                                    | 24<br>(35.5%) | 44 (64.7%)                                | 17 (47.2%)    | 19 (52.8%)                                   | .563**                                    | .505**                      | .448**                             | .185                               | .388**        | -.10        | .212*        | .216*       |
| <b>P4_3<br/>(suicide likelihood)</b>            | 98 (94.2%)    | 6 (5.7%)                                      | 65<br>(95.6%) | 3 (3.4%)                                  | 33 (91.7%)    | 3 (8.4%)                                     | .252**                                    | .293**                      | .231*                              | .400**                             | .196*         | -.05        | .203*        | .422**      |
| <b>P4_4<br/>(preventive factors)</b>            | 96 (93.2%)    | 7 (6.8%)                                      | 64<br>(95.5%) | 3 (4.5%)                                  | 32 (88.9%)    | 4 (11.1%)                                    | .049                                      | .010                        | .061                               | -.048                              | -.003         | -.053       | .053         | .129        |
| <b>P4_risk<br/>(minimal, lower,<br/>higher)</b> | 34 (33.0%)    | lower: 58<br>(56.3%)<br>higher: 11<br>(10.7%) | 19<br>(28.4%) | lower: 42<br>(62.7%)<br>higher: 6<br>(9%) | 15<br>(34.7%) | lower: 16<br>(44.4%)<br>higher: 5<br>(13.9%) | .600**                                    | .492**                      | .408**                             | .229*                              | .354**        | -.10        | .283**       | .358**      |

\*\* correlation is significant at  $P < .01$  level, \*correlation is significant at  $p < .05$

**P4\_1:** Have you ever attempted to harm yourself in the past? (no/yes)

**P4\_2:** Have you thought about how you might actually hurt yourself? (no/yes)

**P4\_3:** There's a big difference between having a thought and acting on a thought. How likely do you think it is that you will act on these thoughts about hurting yourself or ending your life some time over the next month? (not at all likely/somewhat likely/ very likely)

**P4\_4:** Is there anything that would prevent or keep you from harming yourself? (no/yes)

## ST2. Qualitative evaluation (Subgroups) of Suicidal Ideation Plans and Preventive Factors

| <u>Specialized setting</u>     |           |            | <u>Primary care</u>            |           |            |
|--------------------------------|-----------|------------|--------------------------------|-----------|------------|
| Suicidal Ideations Plans       | N         | %          | Suicidal Ideations Plans       | N         | %          |
| medication overdose            | 27        | 29.7       | medication overdose            | 20        | 27.8       |
| cutting oneself                | 18        | 19.8       | intentional vehicular accident | 14        | 19.4       |
| intentional vehicular accident | 15        | 16.5       | cutting oneself                | 11        | 15.3       |
| others                         | 13        | 14.3       | others                         | 8         | 11.1       |
| hanging                        | 6         | 6.6        | falls                          | 8         | 11.1       |
| falls                          | 6         | 6.6        | no answer                      | 7         | 9.7        |
| no answer                      | 5         | 5.5        | hanging                        | 3         | 4.2        |
| using a gun                    | 1         | 1.1        | using a gun                    | 1         | 1.4        |
| <b>Total</b>                   | <b>91</b> | <b>100</b> | <b>Total</b>                   | <b>72</b> | <b>100</b> |

| <u>Specialized setting</u> |            |            | <u>Primary care</u> |            |            |
|----------------------------|------------|------------|---------------------|------------|------------|
| Preventive Factors         | N          | %          | Preventive Factors  | N          | %          |
| family                     | 78         | 66.1       | family              | 69         | 69.0       |
| future hope                | 20         | 16.9       | future hope         | 13         | 13.0       |
| faith                      | 6          | 5.1        | faith               | 6          | 6.0        |
| fear of failing            | 4          | 3.4        | fear of failing     | 4          | 4.0        |
| others                     | 10         | 8.5        | others              | 8          | 8.0        |
| <b>Total</b>               | <b>118</b> | <b>100</b> | <b>Total</b>        | <b>100</b> | <b>100</b> |
